# Supplementary material for: Physiologic and pathophysiologic roles of extra renal CYP27b1: Case report and review
Source: PubMed Central journal article supplement — Bone Rep. 2018 Feb 26;8:255–67. doi: 10.1016/j.bonr.2018.02.004 (PMC6021194; doi:10.1016/j.bonr.2018.02.004), 2018-02-26
Supplement: mmc1.pdf [file mmc1.pdf]

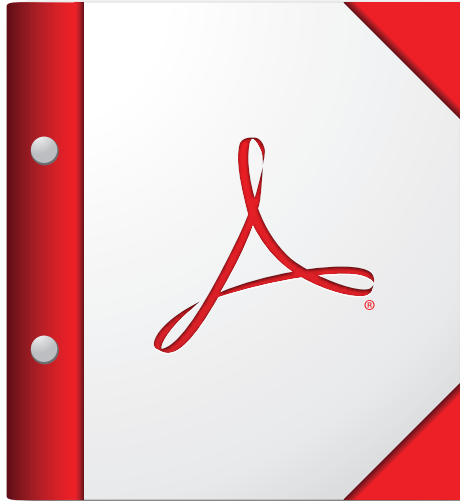

**For the best experience, open this PDF portfolio in  
Acrobat 9 or Adobe Reader 9, or later.**

[Get Adobe Reader Now!](#)
